# Supplementary material
Source: PubMed Central journal article supplement (PMC2775975)
Supplement: en.2009-0578_7.pdf [file en.2009-0578_7.pdf]

---

---

| <b>Time post injection</b> | <b>Icv injection</b> |                   |
|----------------------------|----------------------|-------------------|
|                            | <b>Vehicle</b>       | <b>Nesfatin-1</b> |
|                            | (n=6-9)              | (n=6-10)          |
| 20 min                     | 124.5 ± 7.9          | 118.8 ± 5.1       |
| 1 h                        | 120.0 ± 3.6          | 117.9 ± 3.1       |
| 2 h                        | 115.2 ± 3.8          | 120.0 ± 4.2       |

---

---
