# Supplementary material
Source: PubMed Central journal article supplement (PMC2775975)
Supplement: en.2009-0578_8.pdf [file en.2009-0578_8.pdf]

---

---

| <b>Parameter</b>                                           | <b>Icv injection</b> |                   |
|------------------------------------------------------------|----------------------|-------------------|
|                                                            | <b>Vehicle</b>       | <b>Nesfatin-1</b> |
| <b>Locomotor activity</b><br>(number of squares crossed/h) | 41.9 ± 11.1          | 54.0 ± 8.8        |
| <b>Grooming</b><br>(number of events)                      | 7.8 ± 2.1            | 11.4 ± 1.6        |

---

---

Parameters are mean ± SEM of 8 rats/group.
