# Supplementary material
Source: PubMed Central journal article supplement (PMC2775975)
Supplement: en.2009-0578_9.pdf [file en.2009-0578_9.pdf]

---

| <b>Reduction of food intake</b>   | <b>Nesfatin-1 icv (0.05µg)</b> | <b>Nesfatin-1 ic (0.5µg)</b>   |
|-----------------------------------|--------------------------------|--------------------------------|
| <b>Hourly</b>                     | during 3 <sup>rd</sup> h (87%) | during 1 <sup>st</sup> h (60%) |
| <b>Cumulative</b>                 | 3-6h (45%)                     | 3-6h (30%)                     |
| <b>CRF<sub>2</sub>-dependency</b> | Yes                            | No                             |

---
