# Supplementary material
Source: PubMed Central journal article supplement (PMC2775975)

## Supplemental Fig. 1

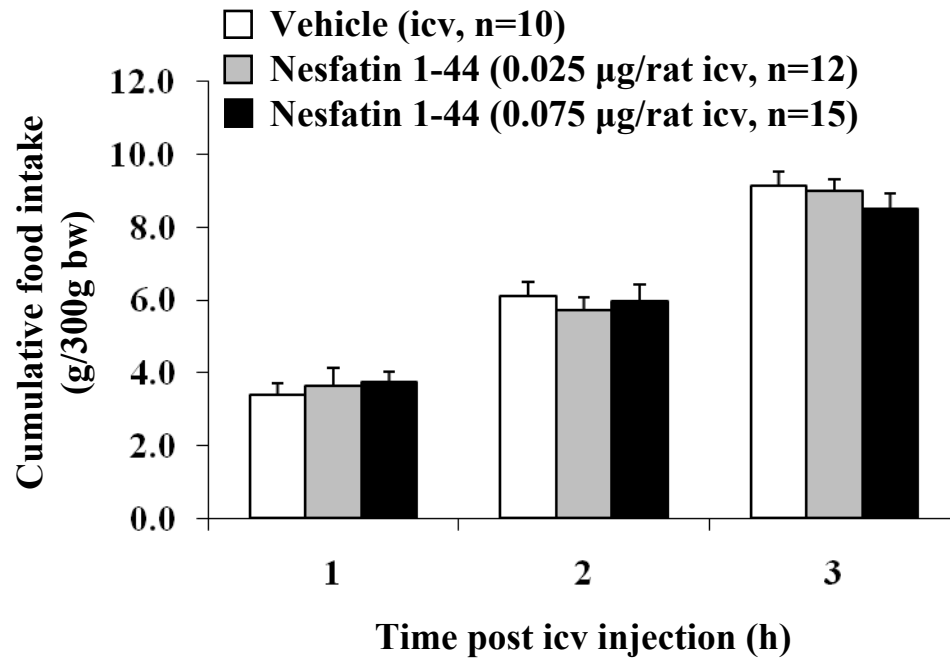

Supplement: en.2009-0578_1.pdf [file en.2009-0578_1.pdf]

## Supplemental Fig. 2

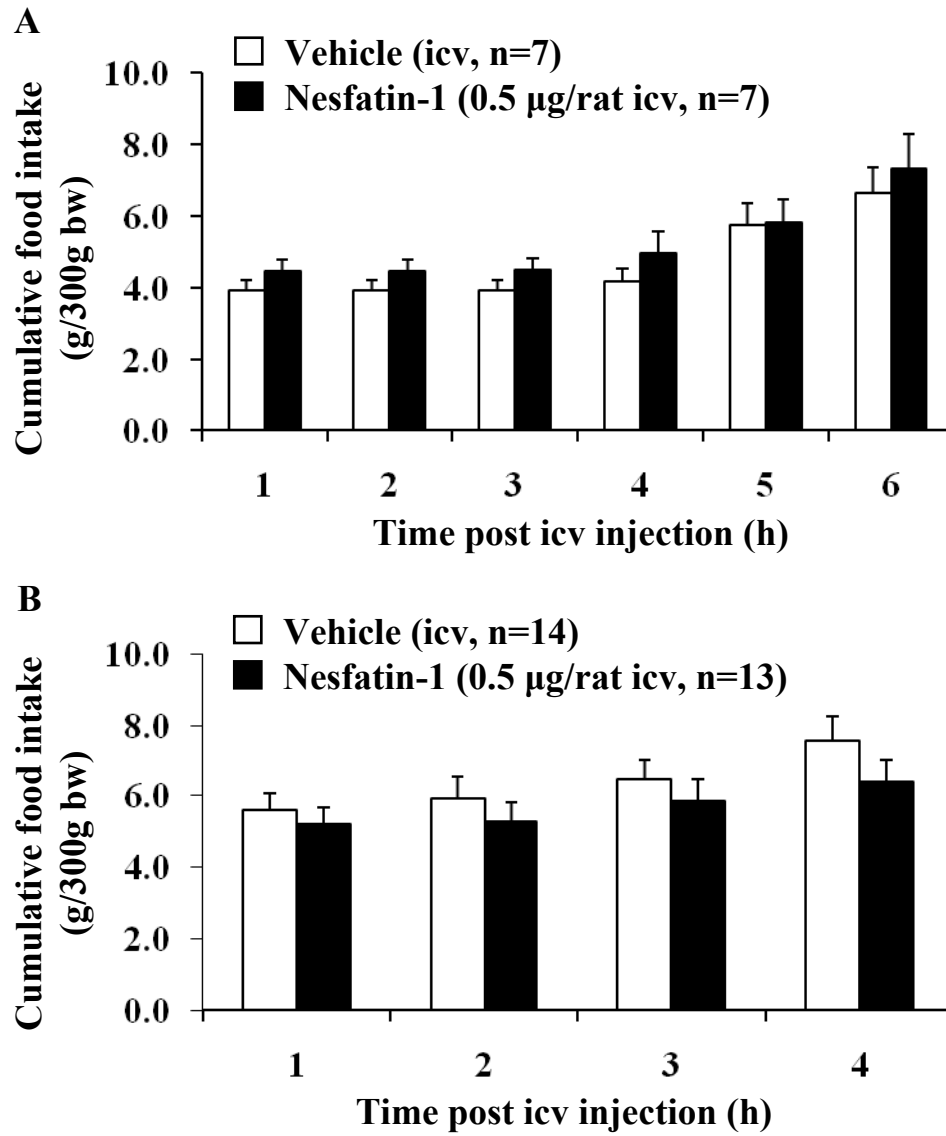

Supplement: en.2009-0578_2.pdf [file en.2009-0578_2.pdf]

### Supplemental Fig. 3

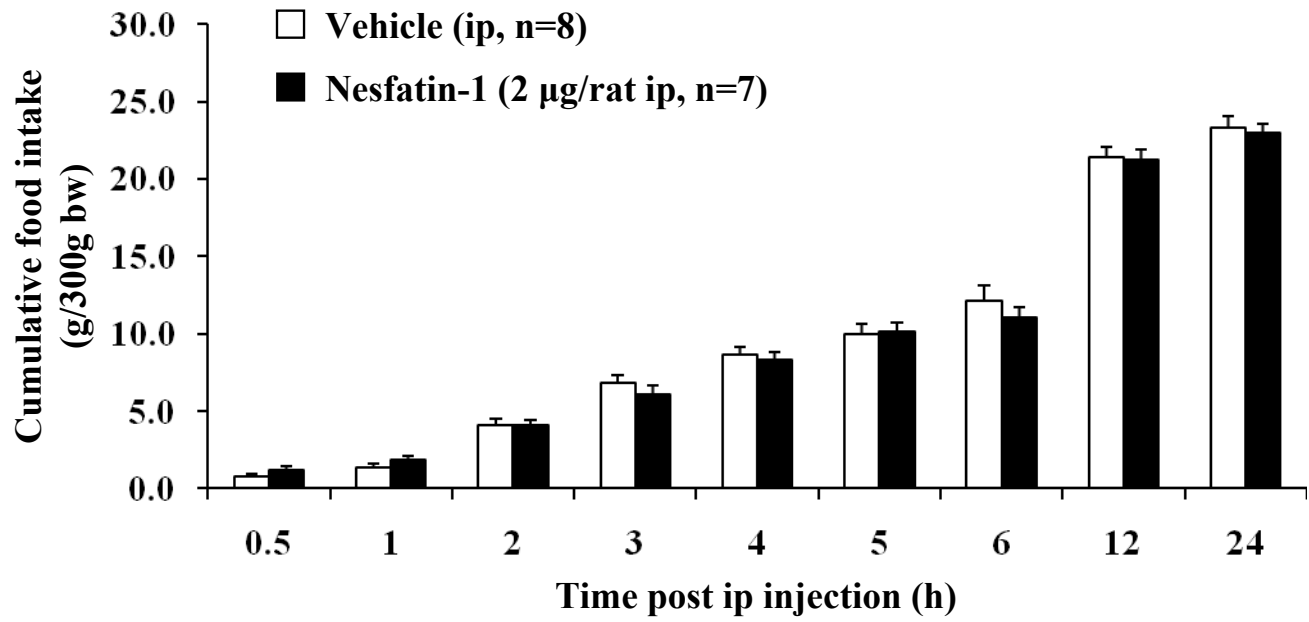

Supplement: en.2009-0578_3.pdf [file en.2009-0578_3.pdf]

## Supplemental Fig. 4

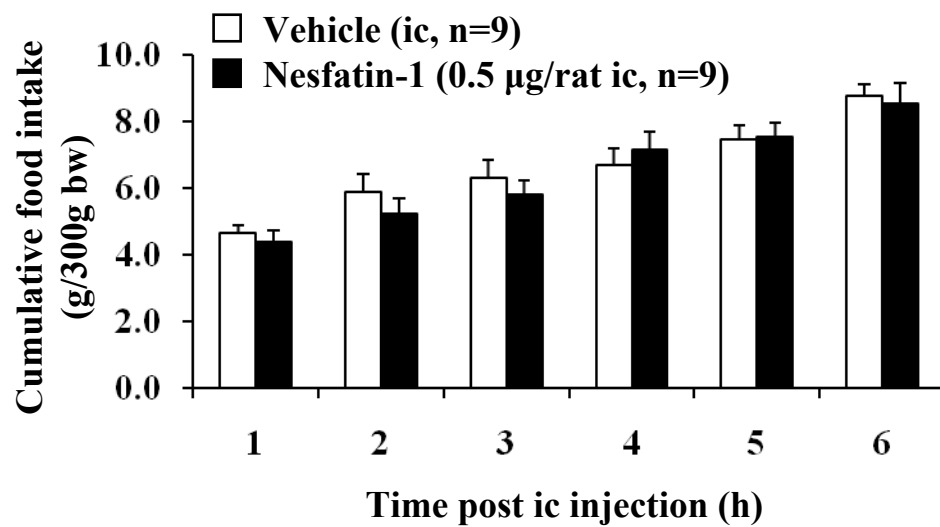

Supplement: en.2009-0578_4.pdf [file en.2009-0578_4.pdf]

# Supplemental Fig. 5

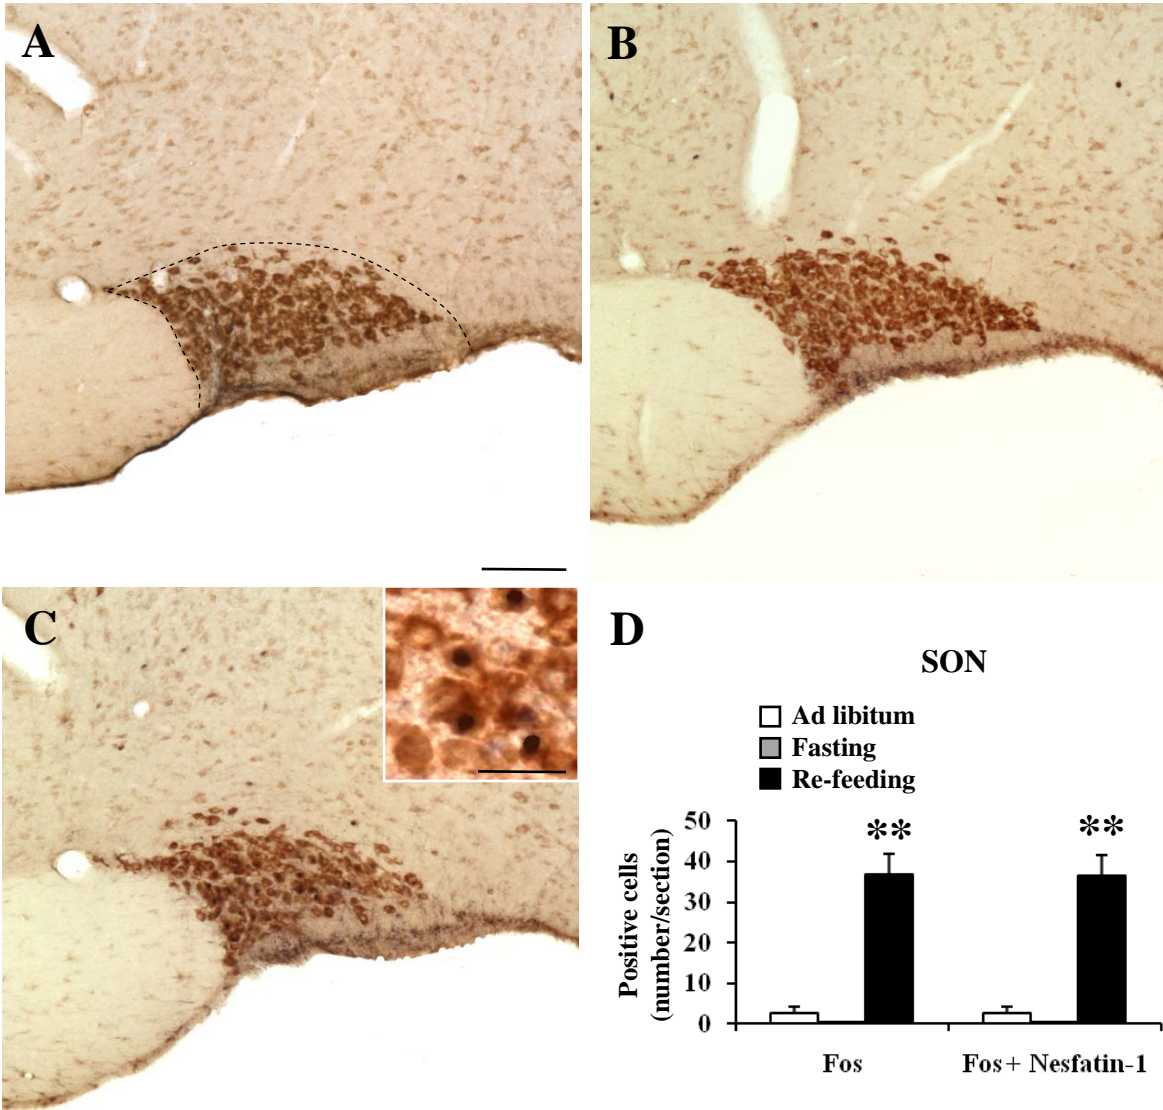

Supplement: en.2009-0578_5.pdf [file en.2009-0578_5.pdf]

# Supplemental Fig. 6

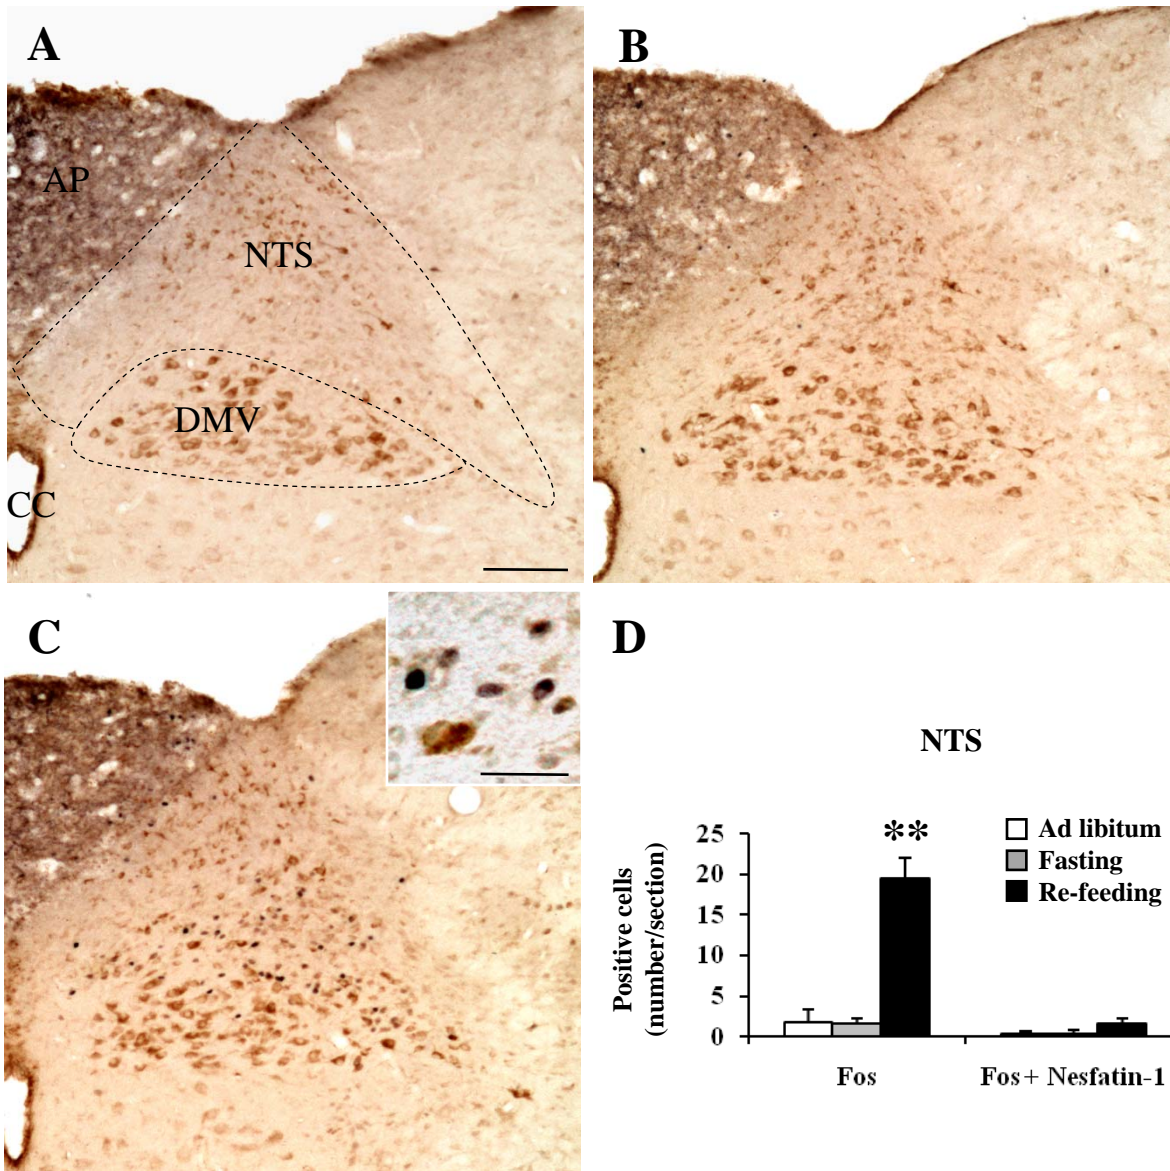

Supplement: en.2009-0578_6.pdf [file en.2009-0578_6.pdf]
